# Supplementary material for: Synthesis of a series of hetero-multi-spin Ln2Cu3 complexes based on a methyl-pyrazole nitronyl nitroxide radical with slow magnetic relaxation behaviors
Source: Royal Society of Chemistry journal article supplement (doi:10.1039/c9dt00981g), 2019-01-01
Supplement: c9dt00981g1.pdf [file c9dt00981g1.pdf]

# Supporting Information

## A series of hetero-multi-spin $\text{Ln}_2\text{Cu}_3$ complexes based on a methyl-pyrazole nitronyl nitroxide radical with slow magnetic relaxation behaviors

Jian Yun Shi, Peng Yun Chen, Ming Ze Wu, Li Tian,\* and Zhong Yi Liu\*

*Tianjin Key Laboratory of Structure and Performance for Functional Molecules, Key  
Laboratory of Inorganic-Organic Hybrid Functional Materials Chemistr (MOE),  
College of Chemistry, Tianjin Normal University, Tianjin 300387, P. R. China.*

### Table of Contents

|            |                                 |     |
|------------|---------------------------------|-----|
| Section S1 | Crystallographic Data           | 2   |
| Section S2 | Powder X-ray Diffraction (PXRD) | 3   |
| Section S3 | Other crystal structure graphic | 3-5 |
| Section S4 | Other Magnetic Data             | 5-6 |
| Section S5 | Tables of Crystal Data          | 7-9 |
| Section S6 | References                      | 10  |

## 1. Crystallographic Data

**X-Ray crystallography.** Crystallographic data were measured at 150 K (for **1**) 293 K (for **2**) and 150 K (for **3**) on an Agilent SuperNova (Dual, Cu at zero, AtlasS2, CCD) diffractometer equipped with graphite-monochromated Cu-K $\alpha$  radiation ( $\lambda = 1.54184$  Å), using the  $\varphi$ - $\omega$  scan technique. Semiempirical multiscan absorption corrections were applied by SCALE3 ABSPACK, and the programs CrysAlisPro were used for integration of the diffraction profiles.<sup>1</sup> The structures were solved by direct methods and refined using least squares minimization using the ShelXT and ShelXL programs.<sup>2</sup> Some restraints are employed, such as ISOR (anisotropic parameter), DFIX (restricting the distance between two atoms) to solve the disorder of the F atoms. Besides F atoms, all other non-hydrogen atoms were refined anisotropically, and hydrogen atoms were located geometrically and refined isotropically. Crystallographic data for the three compounds are listed in Table S1.

**Table S1.** Crystallographic Data and Structure Refinement Details for **1-3**

|                                                                                      | <b>1</b>                                                                                           | <b>2</b>                                                                                            | <b>3</b>                                                                                           |
|--------------------------------------------------------------------------------------|----------------------------------------------------------------------------------------------------|-----------------------------------------------------------------------------------------------------|----------------------------------------------------------------------------------------------------|
| formula                                                                              | C <sub>52</sub> H <sub>40</sub> Cu <sub>1.5</sub> F <sub>36</sub> GdN <sub>8</sub> O <sub>16</sub> | C <sub>52</sub> H <sub>40</sub> Cu <sub>1.5</sub> F <sub>36</sub> N <sub>8</sub> O <sub>16</sub> Tb | C <sub>52</sub> H <sub>40</sub> Cu <sub>1.5</sub> DyF <sub>36</sub> N <sub>8</sub> O <sub>16</sub> |
| Mr                                                                                   | 1969.48                                                                                            | 1971.15                                                                                             | 1974.73                                                                                            |
| crystal system                                                                       | triclinic                                                                                          | triclinic                                                                                           | triclinic                                                                                          |
| space group                                                                          | <i>P</i> $\bar{1}$                                                                                 | <i>P</i> $\bar{1}$                                                                                  | <i>P</i> $\bar{1}$                                                                                 |
| <i>a</i> (Å)                                                                         | 11.9296(3)                                                                                         | 11.9225(2)                                                                                          | 11.9061(2)                                                                                         |
| <i>b</i> (Å)                                                                         | 18.3338(3)                                                                                         | 18.3300(3)                                                                                          | 18.3248(5)                                                                                         |
| <i>c</i> (Å)                                                                         | 20.3498(4)                                                                                         | 20.3485(4)                                                                                          | 20.3320(5)                                                                                         |
| $\alpha$ (°)                                                                         | 94.2310(10)                                                                                        | 94.5361(15)                                                                                         | 94.322(2)                                                                                          |
| $\beta$ (°)                                                                          | 92.598(2)                                                                                          | 92.4970(15)                                                                                         | 92.4181(17)                                                                                        |
| $\gamma$ (°)                                                                         | 95.684(2)                                                                                          | 95.6302(15)                                                                                         | 95.6122(19)                                                                                        |
| <i>V</i> (Å <sup>3</sup> )                                                           | 4410.63(16)                                                                                        | 4405.71(14)                                                                                         | 4396.67(19)                                                                                        |
| <i>Z</i>                                                                             | 2                                                                                                  | 2                                                                                                   | 2                                                                                                  |
| $\rho$ calc (Mg/m <sup>3</sup> )                                                     | 1.483                                                                                              | 1.486                                                                                               | 1.492                                                                                              |
| $\mu$ (mm <sup>-1</sup> )                                                            | 6.443                                                                                              | 5.528                                                                                               | 6.131                                                                                              |
| <i>F</i> (000)                                                                       | 1935                                                                                               | 1937                                                                                                | 1939                                                                                               |
| $\theta$ range(°)                                                                    | 3.135~67.077                                                                                       | 2.181~67.079                                                                                        | 2.182~67.078                                                                                       |
| GOF on <i>F</i> <sup>2</sup>                                                         | 1.083                                                                                              | 1.023                                                                                               | 0.998                                                                                              |
| <i>R</i> <sub>1</sub> / <i>wR</i> <sub>2</sub> [ <i>I</i> > 2 $\sigma$ ( <i>I</i> )] | 0.0714, 0.2003                                                                                     | 0.0439, 0.1123                                                                                      | 0.0665, 0.1664                                                                                     |
| <i>R</i> <sub>1</sub> / <i>wR</i> <sub>2</sub> (all data)                            | 0.0781, 0.2100                                                                                     | 0.0465, 0.1146                                                                                      | 0.0773, 0.1759                                                                                     |

## 2. Powder X-ray Diffraction

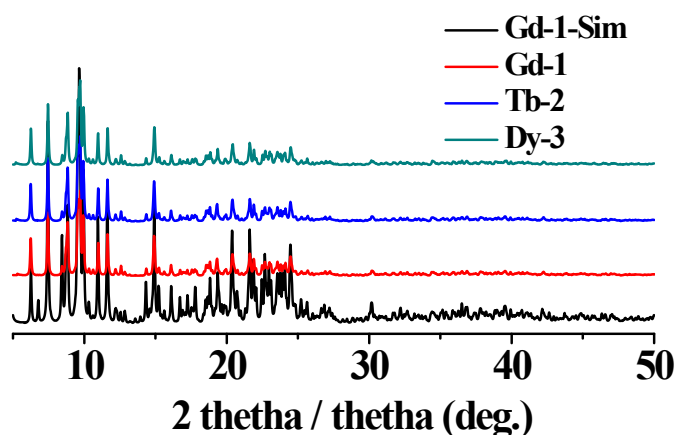

Figure S1. Powder X-ray diffractions of 1-3.

## 3. Other crystal structure graphic

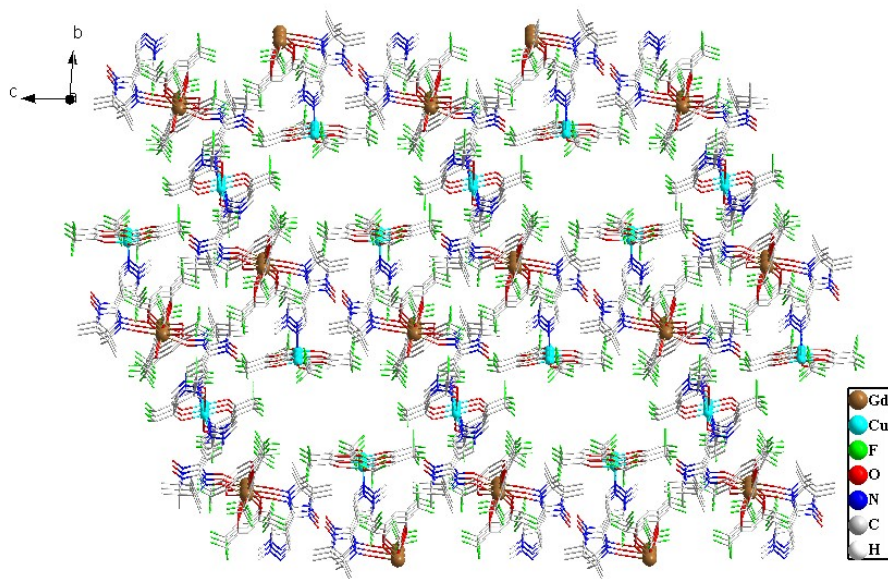

Figure S2. Packing arrangement of the clusters in **1**. Hydrogen atoms are omitted for clarity.

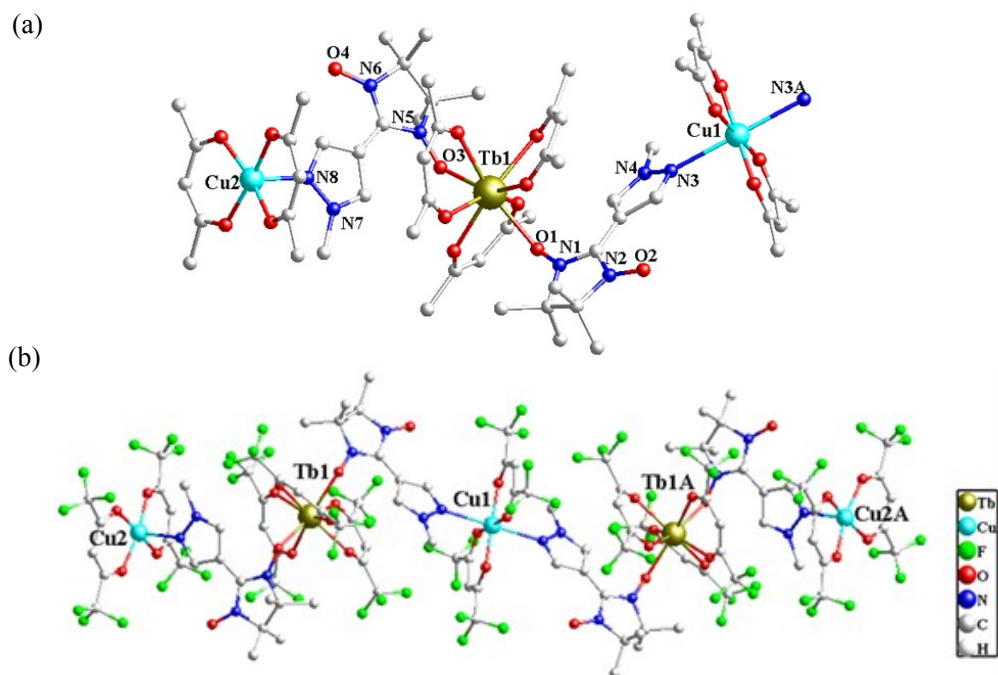

Figure S3. (a) The asymmetry unit of  $[\text{Tb}_2\text{Cu}_3(\text{hfac})_{12}(4\text{-NIT-MePyz})_4]$  (**2**). Fluorine and hydrogen atoms are omitted for clarity. (b) The detail arrangement of the  $\text{Tb}_2\text{Cu}_3$  cluster in **2**.

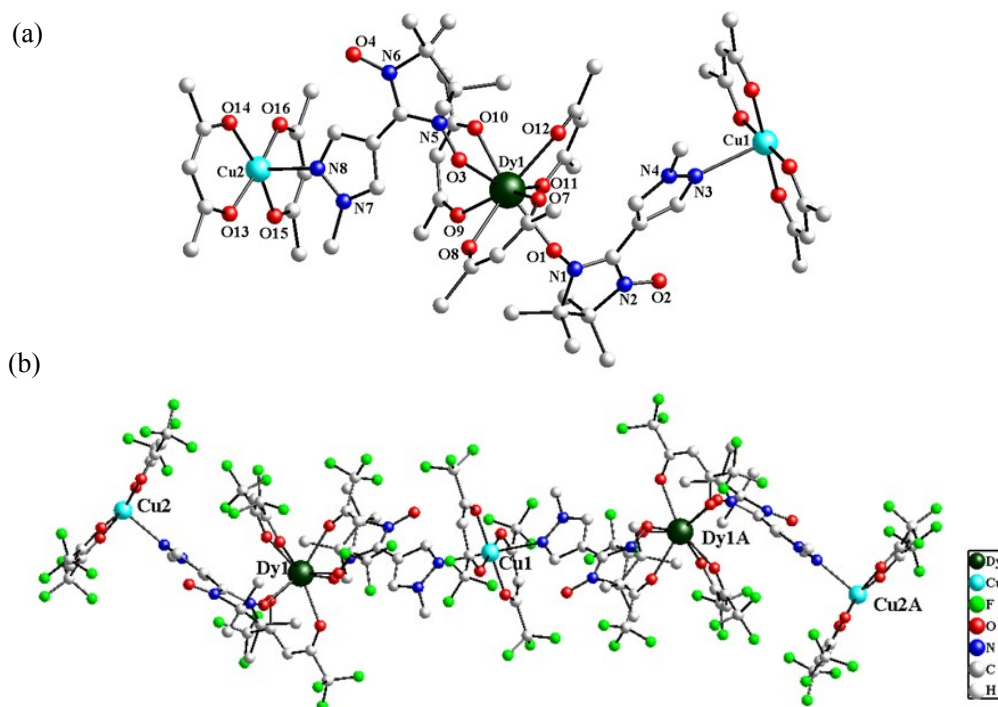

Figure S4. (a) The asymmetry unit of  $[\text{Dy}_2\text{Cu}_3(\text{hfac})_{12}(4\text{-NIT-MePyz})_4]$  (**3**). Fluorine and hydrogen atoms are omitted for clarity. (b) The detail arrangement of the  $\text{Dy}_2\text{Cu}_3$  cluster in **3**.

Table S2. Lanthanide geometry analysis by *SHAPE* software

| Ln(III) | $D_{2d}$ -DD | $C_{2v}$ -TP | $D_{4d}$ -AP |
|---------|--------------|--------------|--------------|
| Gd1(1)  | 0.123        | 2.500        | 2.267        |
| Tb1(2)  | 0.111        | 2.514        | 2.243        |
| Dy1(3)  | 0.099        | 2.508        | 2.285        |

#### 4. Other magnetic data

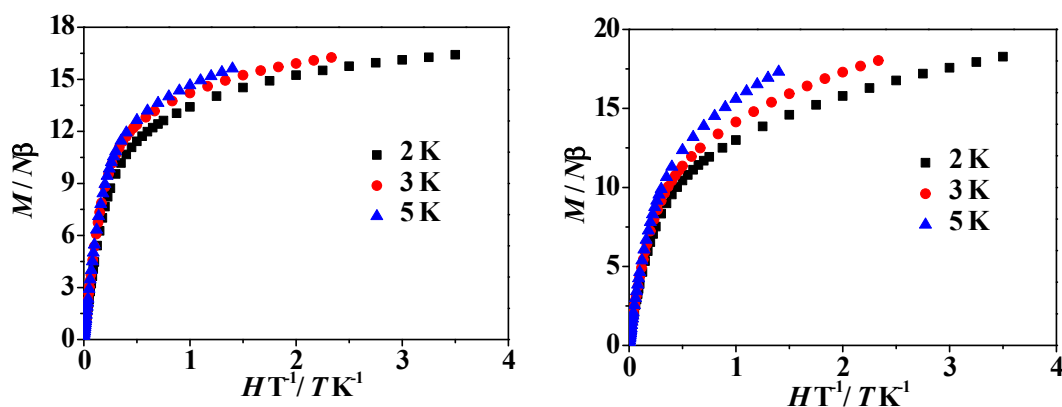

Figure S5. Field dependence of the magnetization at the temperature of 2, 3, and 5 K for complexes **2** (left) and **3** (right).

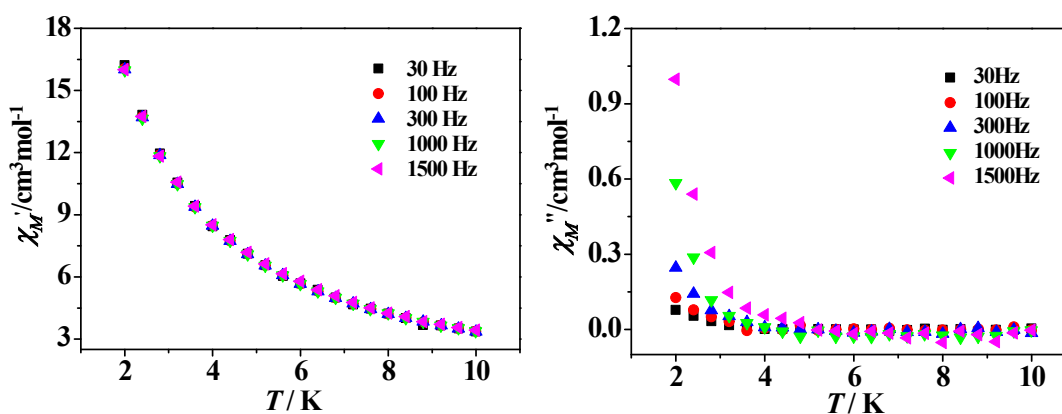

Figure S6. Temperature dependencies of the in-phase (left) and out-phase (right) components of the ac magnetic susceptibility for **2** at zero dc fields with an oscillation of 3.0 Oe at frequencies from 30 Hz to 10000 Hz.

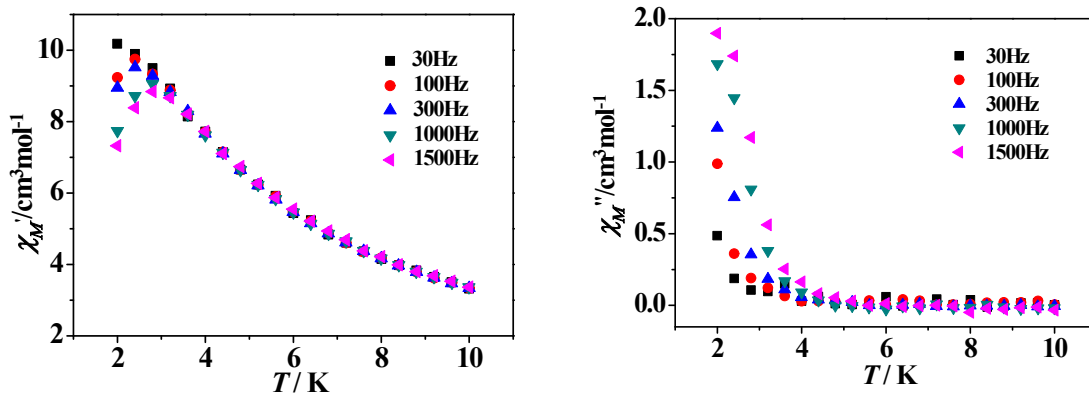

Figure S7. Temperature dependencies of the in-phase (left) and out-of-phase (right) components of the ac magnetic susceptibility for **2** at 2000 Oe dc fields with an oscillation of 3.0 Oe at frequencies from 30 Hz to 1500 Hz.

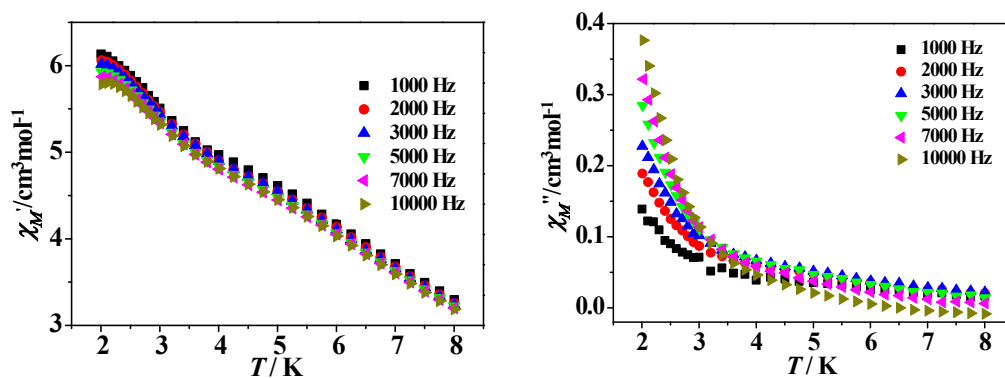

Figure S8. Temperature-dependent of the in-phase ( $\chi'$ , left) and out-of-phase signals ( $\chi''$ , right) components of the ac magnetic susceptibility for **3** under 2000 Oe dc fields with an oscillation of 3.5 Oe at frequencies from 1000 Hz to 10000 Hz.

## 5. Tables of Crystal Data

Table S3. Selected bond lengths (Å) and bond angles (°) in complex 1.

|                  |            |                   |            |
|------------------|------------|-------------------|------------|
| Gd(1)-O(1)       | 2.382(3)   | O(3)-Gd(1)-O(8)   | 149.21(13) |
| Gd(1)-O(3)       | 2.354(4)   | O(3)-Gd(1)-O(9)   | 72.27(14)  |
| Gd(1)-O(7)       | 2.373(4)   | O(3)-Gd(1)-O(10)  | 73.07(13)  |
| Gd(1)-O(8)       | 2.370(4)   | O(3)-Gd(1)-O(12)  | 99.07(14)  |
| Gd(1)-O(9)       | 2.381(4)   | O(7)-Gd(1)-O(8)   | 72.68(13)  |
| Gd(1)-O(10)      | 2.379(4)   | O(7)-Gd(1)-O(12)  | 136.12(14) |
| Gd(1)-O(11)      | 2.419(4)   | O(8)-Gd(1)-O(12)  | 73.95(14)  |
| Gd(1)-O(12)      | 2.352(4)   | O(9)-Gd(1)-O(7)   | 150.90(14) |
| Cu(1)-O(5)       | 1.950(4)   | O(9)-Gd(1)-O(8)   | 130.35(13) |
| Cu(1)-O(6)       | 1.967(4)   | O(9)-Gd(1)-O(12)  | 72.75(14)  |
| Cu(1)-N(3)       | 2.432(5)   | O(10)-Gd(1)-O(7)  | 77.57(14)  |
| Cu(1)-O(5)#1     | 1.950(4)   | O(10)-Gd(1)-O(8)  | 128.65(13) |
| Cu(1)-O(6)#1     | 1.967(4)   | O(10)-Gd(1)-O(9)  | 73.67(14)  |
| Cu(1)-N(3)#1     | 2.432(5)   | O(5)-Cu(1)-O(5)#1 | 180.0      |
| Cu(2)-O(13)      | 1.945(4)   | O(5)-Cu(1)-N(3)#1 | 86.48(16)  |
| Cu(2)-O(14)      | 1.949(5)   | O(5)-Cu(1)-N(3)   | 93.52(16)  |
| Cu(2)-O(15)      | 1.935(5)   | O(6)-Cu(1)-O(5)   | 92.85(16)  |
| Cu(2)-O(16)      | 1.938(4)   | O(6)-Cu(1)-O(5)#1 | 87.15(16)  |
| Cu(2)-N(8)       | 2.262(5)   | O(6)-Cu(1)-O(6)#1 | 180.0      |
| O(1)-Gd(1)-O(3)  | 136.73(13) | O(6)-Cu(1)-N(3)   | 88.98(17)  |
| O(1)-Gd(1)-O(7)  | 101.08(13) | O(13)-Cu(2)-O(14) | 91.5(2)    |
| O(1)-Gd(1)-O(8)  | 74.03(13)  | O(13)-Cu(2)-O(15) | 166.5(2)   |
| O(1)-Gd(1)-O(9)  | 74.18(13)  | O(13)-Cu(2)-O(16) | 88.18(18)  |
| O(1)-Gd(1)-O(10) | 71.85(13)  | O(13)-Cu(2)-N(8)  | 93.43(19)  |
| O(1)-Gd(1)-O(12) | 96.23(13)  | O(14)-Cu(2)-O(16) | 171.2(2)   |
| O(3)-Gd(1)-O(7)  | 95.28(14)  | O(15)-Cu(2)-N(8)  | 100.04(19) |

Table S4. Selected bond lengths (Å) and bond angles (°) in complex 2.

|                  |           |                   |            |
|------------------|-----------|-------------------|------------|
| Tb(1)-O(1)       | 2.354(2)  | O(3)-Tb(1)-O(8)   | 72.36(8)   |
| Tb(1)-O(3)       | 2.354(2)  | O(3)-Tb(1)-O(9)   | 149.24(8)  |
| Tb(1)-O(7)       | 2.363(2)  | O(3)-Tb(1)-O(10)  | 95.13(8)   |
| Tb(1)-O(8)       | 2.364(2)  | O(3)-Tb(1)-O(12)  | 73.18(8)   |
| Tb(1)-O(9)       | 2.361(2)  | O(7)-Tb(1)-O(8)   | 74.03(8)   |
| Tb(1)-O(10)      | 2.359(2)  | O(7)-Tb(1)-O(12)  | 131.77(8)  |
| Tb(1)-O(11)      | 2.337(2)  | O(8)-Tb(1)-O(12)  | 124.97(8)  |
| Tb(1)-O(12)      | 2.400(2)  | O(9)-Tb(1)-O(7)   | 128.70(8)  |
| Cu(1)-O(5)       | 1.960(2)  | O(9)-Tb(1)-O(8)   | 130.29(8)  |
| Cu(1)-O(6)       | 1.959(2)  | O(9)-Tb(1)-O(12)  | 76.21(8)   |
| Cu(1)-N(3)       | 2.429(3)  | O(10)-Tb(1)-O(7)  | 77.16(8)   |
| Cu(1)-O(5)#1     | 1.960(2)  | O(10)-Tb(1)-O(8)  | 150.87(8)  |
| Cu(1)-O(6)#1     | 1.959(2)  | O(10)-Tb(1)-O(9)  | 72.77(8)   |
| Cu(1)-N(3)#1     | 2.429(3)  | O(5)-Cu(1)-O(5)#1 | 180.00(11) |
| Cu(2)-O(13)      | 1.937(3)  | O(5)-Cu(1)-N(3)#1 | 89.23(10)  |
| Cu(2)-O(14)      | 1.945(3)  | O(5)-Cu(1)-N(3)   | 90.77(10)  |
| Cu(2)-O(15)      | 1.941(3)  | O(6)-Cu(1)-O(5)   | 92.55(10)  |
| Cu(2)-O(16)      | 1.956(3)  | O(6)-Cu(1)-O(5)#1 | 87.45(10)  |
| Cu(2)-N(8)       | 2.272(3)  | O(6)-Cu(1)-O(6)#1 | 180.0      |
| O(1)-Tb(1)-O(3)  | 136.82(8) | O(6)-Cu(1)-N(3)   | 86.36(10)  |
| O(1)-Tb(1)-O(7)  | 72.32(8)  | O(13)-Cu(2)-O(14) | 92.37(11)  |
| O(1)-Tb(1)-O(8)  | 74.24(8)  | O(13)-Cu(2)-O(15) | 172.40(13) |
| O(1)-Tb(1)-O(9)  | 73.91(8)  | O(13)-Cu(2)-O(16) | 87.65(11)  |
| O(1)-Tb(1)-O(10) | 101.05(8) | O(13)-Cu(2)-N(8)  | 95.01(12)  |
| O(1)-Tb(1)-O(12) | 149.92(8) | O(14)-Cu(2)-O(16) | 166.88(12) |
| O(3)-Tb(1)-O(7)  | 72.76(8)  | O(15)-Cu(2)-N(8)  | 92.59(12)  |



Table S5. Selected bond lengths (Å) and bond angles (°) in complex **3**.

|                  |            |                   |            |
|------------------|------------|-------------------|------------|
| Dy(1)-O(1)       | 2.345(3)   | O(3)-Dy(1)-O(8)   | 72.38(13)  |
| Dy(1)-O(3)       | 2.348(3)   | O(3)-Dy(1)-O(9)   | 99.19(13)  |
| Dy(1)-O(7)       | 2.355(4)   | O(3)-Dy(1)-O(10)  | 73.07(13)  |
| Dy(1)-O(8)       | 2.349(4)   | O(3)-Dy(1)-O(12)  | 95.33(13)  |
| Dy(1)-O(9)       | 2.324(4)   | O(7)-Dy(1)-O(8)   | 74.20(14)  |
| Dy(1)-O(10)      | 2.395(4)   | O(7)-Dy(1)-O(12)  | 76.98(14)  |
| Dy(1)-O(11)      | 2.358(3)   | O(8)-Dy(1)-O(12)  | 150.89(13) |
| Dy(1)-O(12)      | 2.348(4)   | O(9)-Dy(1)-O(7)   | 146.94(13) |
| Cu(1)-O(5)       | 1.962(4)   | O(9)-Dy(1)-O(8)   | 72.83(13)  |
| Cu(1)-O(6)       | 1.962(3)   | O(9)-Dy(1)-O(12)  | 136.08(13) |
| Cu(1)-N(3)       | 2.430(5)   | O(10)-Dy(1)-O(7)  | 131.42(13) |
| Cu(1)-O(5)#1     | 1.962(4)   | O(10)-Dy(1)-O(8)  | 150.87(8)  |
| Cu(1)-O(6)#1     | 1.962(3)   | O(10)-Dy(1)-O(9)  | 72.32(13)  |
| Cu(1)-N(3)#1     | 2.430(5)   | O(5)-Cu(1)-O(5)#1 | 180.0      |
| Cu(2)-O(13)      | 1.938(4)   | O(5)-Cu(1)-N(3)#1 | 88.90(16)  |
| Cu(2)-O(14)      | 1.954(4)   | O(5)-Cu(1)-N(3)   | 91.10(16)  |
| Cu(2)-O(15)      | 1.946(4)   | O(6)-Cu(1)-O(5)   | 92.76(15)  |
| Cu(2)-O(16)      | 1.943(4)   | O(6)-Cu(1)-O(5)#1 | 87.24(15)  |
| Cu(2)-N(8)       | 2.268(5)   | O(6)-Cu(1)-O(6)#1 | 180.0      |
| O(1)-Dy(1)-O(3)  | 137.27(13) | O(6)-Cu(1)-N(3)   | 86.21(15)  |
| O(1)-Dy(1)-O(7)  | 72.72(13)  | O(13)-Cu(2)-O(14) | 92.09(19)  |
| O(1)-Dy(1)-O(8)  | 74.42(12)  | O(13)-Cu(2)-O(15) | 85.94(19)  |
| O(1)-Dy(1)-O(9)  | 95.92(13)  | O(13)-Cu(2)-O(16) | 171.8(2)   |
| O(1)-Dy(1)-O(10) | 149.59(13) | O(13)-Cu(2)-N(8)  | 92.9(2)    |
| O(1)-Dy(1)-O(12) | 100.90(13) | O(14)-Cu(2)-O(16) | 87.41(17)  |
| O(3)-Dy(1)-O(7)  | 72.92(13)  | O(15)-Cu(2)-N(8)  | 99.93(18)  |

## 6. References

- (1) O. V. Dolomanov, L. J. Bourhis, R. J. Gildea, J. A. K. Howard, H. Puschmann, *J. Appl. Crystallogr.* **2009**, *42*, 339–341.
- (2) (a) G. M. Sheldrick, *Acta Crystallogr., Sect. A: Found. Adv.* 2015, **71**, 3–8; (b) G. M. Sheldrick, *Acta Crystallogr., Sect. C: Struct. Chem.* 2015, **71**, 3–8.
